# Supplementary material for: Energy-level alignment at interfaces between manganese phthalocyanine and C60
Source: publisher site journal article supplement (doi:10.3762/bjnano.8.94), 2017-04-25
Supplement: Additional file 1 [file 2190-4286-8-94-S1.pdf]

# **Supporting Information**

for

## **Energy-level alignment at interfaces between manganese phthalocyanine and C<sub>60</sub>**

Daniel Waas\*, Florian Ruckerl , Martin Knupfer\* and Bernd Büchner

Address: IFW Dresden, P.O. Box 270116, D-01171 Dresden, Germany

Email: Daniel Waas - [d.waas@ifw-dresden.de](mailto:d.waas@ifw-dresden.de); Martin Knupfer - [m.knupfer@ifw-dresden.de](mailto:m.knupfer@ifw-dresden.de)

\* Corresponding author

### **Additional spectra**

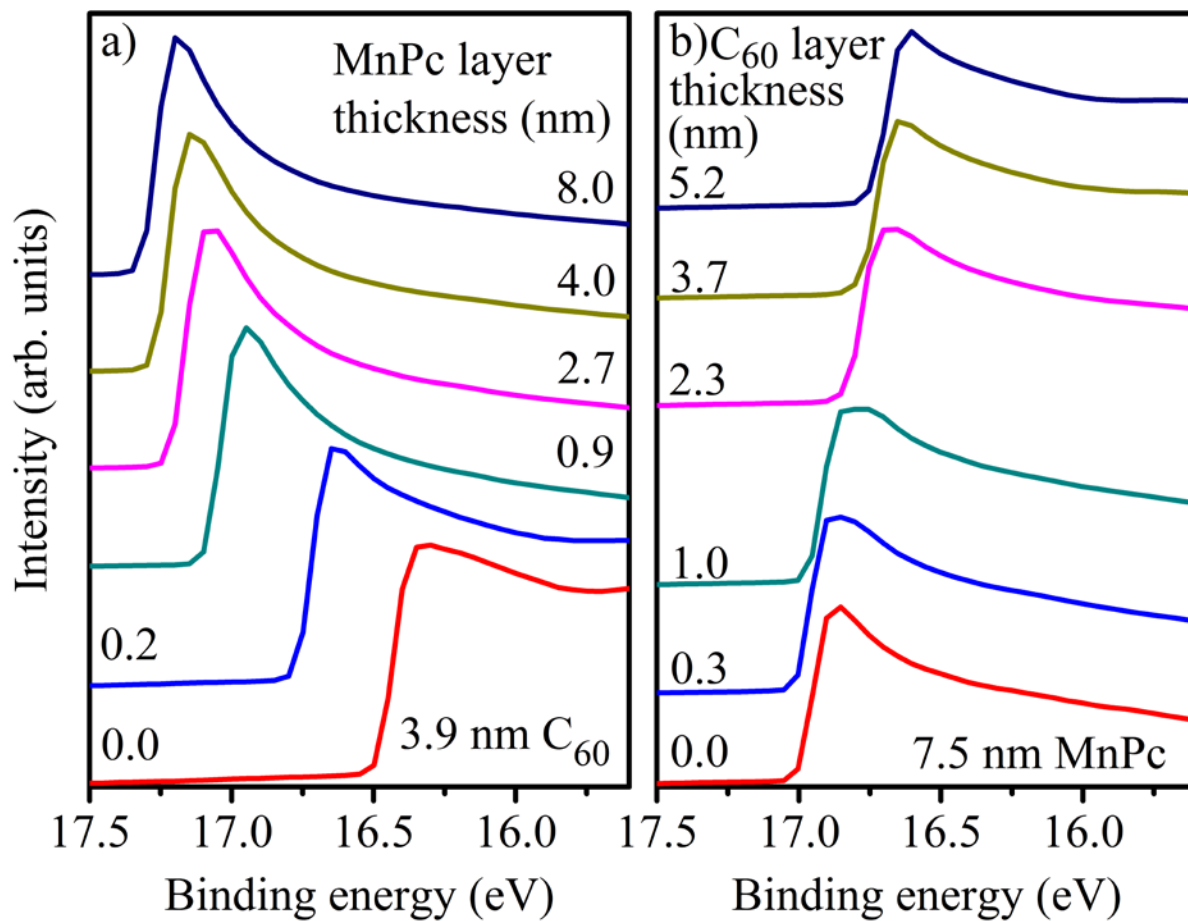

**Figure S1:** Evolution of the secondary-electron cutoff as a function of a) MnPc deposition onto C<sub>60</sub> and b) C<sub>60</sub> deposition onto MnPc, used to determine the workfunction. The corresponding layer thicknesses are indicated.

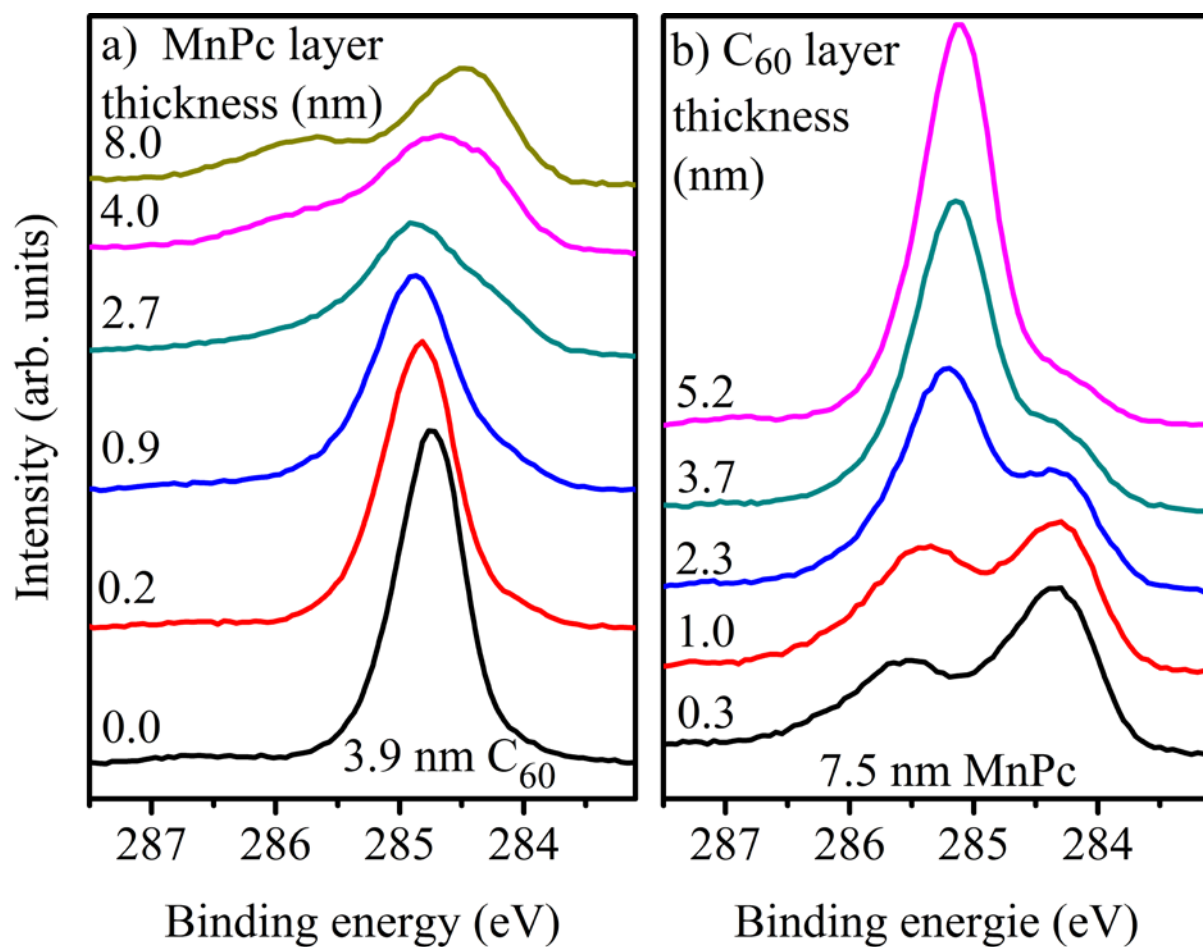

**Figure S2:** C1s core level data of MnPc and C<sub>60</sub> as a function of a) MnPc deposition onto C<sub>60</sub> and b) C<sub>60</sub> deposition onto MnPc. The corresponding layer thicknesses are indicated.
